# Supplementary material for: Programmatic mapping and size estimation of key populations to inform HIV programming in Tanzania
Source: PubMed Central journal article supplement (PMC6992209; doi:10.1371/journal.pone.0228618), 2020-01-30
Supplement: pone.0228618.s003.pdf [file pone.0228618.s003.pdf]

PONE-D-19-24277R1

Programmatic mapping and size estimation of key populations to inform HIV programming in Tanzania, Dr Mwita Wambura

Dear Dr Wambura,

Thank you for submitting your manuscript entitled "Programmatic mapping and size estimation of key populations to inform HIV programming in Tanzania" to PLOS ONE. Your manuscript files have been checked in-house but before we can proceed we need you to address the following issues:

1. Thank you for your response. During our internal evaluation, we noted that the following sentence was removed from your ethics statement

*'To ensure that the local administration in areas where the research was done is informed about the study, approvals to work in the study communities was sought from the regional and district health authorities and from the respective ward and village executive officers.'*

To ensure that a full description of the ethical considerations taken in this study is documented in your manuscript, we ask that you please provide specific details about the approvals sought from the regional and district health authorities in your study.

**Response: "The geographical mapping study received ethical approval from the Medical Research Coordinating Committee (MRCC) of the National Institute for Medical Research (NIMR) in Tanzania (IRB00002514; FWA00002632) with a letter with reference number NIMR/HQ/R.8a/Vol. IX/2086 (attached), and Institutional Review Board of the Johns Hopkins University (IRB 00006668, FWA00000287) with letter dated 15th October 2015 (attached).**

**The monitoring of research studies is done by MRCC in collaboration with district and regional medical authorities. Therefore, the Sauti project wrote letters to seek permission from the regional and district health authorities. I have attached letters from regional, district and community authorities providing permission. Because of a large number of letters received, we have only attached a sample for your review.**

**The above statement was deleted because regional and district health authorities are not ethics committees, and therefore, do not provide ethical approvals.**

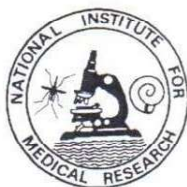

THE UNITED REPUBLIC OF  
TANZANIA

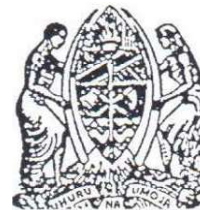

National Institute for Medical Research  
3 Barack Obama Drive  
P.O. Box 9653  
11101 Dar es Salaam  
Tel: 255 22 2121400  
Fax: 255 22 2121360  
E-mail: [headquarters@nimr.or.tz](mailto:headquarters@nimr.or.tz)  
NIMR/HQ/R.8a/Vol. IX/2086

Ministry of Health and Social Welfare  
6 Samora Machel Avenue  
P.O. Box 9083  
11478 Dar es Salaam  
Tel: 255 22 2120262-7  
Fax: 255 22 2110986

16<sup>th</sup> December 2015

Mr Hally Mahler  
JHPIEGO/ Tanzania  
P O BOX 9170  
DAR ES SALAAM

**CLEARANCE CERTIFICATE FOR CONDUCTING  
MEDICAL RESEARCH IN TANZANIA**

This is to certify that the research entitled: Programmatic/ Geographical Mapping of Key Populations in Tanzania, (Mahler H *et al*), whose Local Investigator is Ms Neema Makyao, National Key Populations Coordinator, NACP, MoH & SW, Dar es Salaam, has been granted ethical clearance to be conducted in Tanzania.

The Principal Investigator of the study must ensure that the following conditions are fulfilled:

1. Progress report is submitted to the Ministry of Health and the National Institute for Medical Research, Regional and District Medical Officers after every six months.
2. Permission to publish the results is obtained from National Institute for Medical Research.
3. Copies of final publications are made available to the Ministry of Health & Social Welfare and the National Institute for Medical Research.
4. Any researcher, who contravenes or fails to comply with these conditions, shall be guilty of an offence and shall be liable on conviction to a fine. NIMR Act No. 23 of 1979, PART III Section 10(2).
5. Sites: Dar es Salaam, Dodoma, Morogoro, Arusha, Tanga, Geita, Mwanza, Shinyanga, Iringa, Mbeya, Njombe, and Ruvuma Regions.

Approval is for one year: 16<sup>th</sup> December 2015 to 15<sup>th</sup> December 2016.

Name: Dr Mwelecele Malecela

Signature   
CHAIRPERSON  
MEDICAL RESEARCH  
COORDINATING COMMITTEE

CC: RMO  
DED  
DMO

Name: Prof. Muhammad Bakari Kambi

Signature   
CHIEF MEDICAL OFFICER  
MINISTRY OF HEALTH, SOCIAL  
WELFARE

**Institutional Review Board Office**

615 N. Wolfe Street / Room E1100  
Baltimore, Maryland 21205-2179  
Phone: 410-955-3193  
Toll Free: 1-888-262-3242  
Fax: 410-502-0584  
Email: [jhsph.irboffice@jhu.edu](mailto:jhsph.irboffice@jhu.edu)  
Website: [www.jhsph.edu/irb](http://www.jhsph.edu/irb)

**NOT HUMAN SUBJECTS RESEARCH  
DETERMINATION NOTICE**

**Date:** October 15, 2015

**To:** Hally Mahler, MHS  
Jhpiego: JH Prog for Int'l Educ. in Gyn/Ob

**Re:** **Study Title:** Programmatic and Geographical Mapping of Key Populations in Tanzania”  
**IRB No:** 00006668

The JHSPH IRB-FC reviewed the above-referenced new application on **October 7, 2015**. We have determined that the proposed activity described in your application will involve mapping activities to identify the locations/sites where key population members congregate and/or meet casual or paying sexual partners and key informant interviews concerning the places and areas where sex workers and men who have sex with men are seen and congregate. No personal or private information about informants will be collected. Thus, the proposed activity does not qualify as human subjects research as defined by DHHS regulations 45 CFR 46.102, and does not require IRB oversight.

We anticipate that you will follow ethical practices in your interactions with individuals in the community during the course of your project. You are responsible for notifying the JHSPH IRB of any future changes that might involve human subjects and require IRB oversight.

If you have any questions regarding this action, please contact the JHSPH IRB Office at (410) 955-3193 or via email at [jhsph.irboffice@jhu.edu](mailto:jhsph.irboffice@jhu.edu).

JP/teb

**JAMHURI YA MUUNGANO WA TANZANIA**  
**Ofisi ya Rais**  
**TAWALA ZA MIKOA NA SERIKALI ZA MITAA**

MKOA WA DAR ES SALAAM  
Anwani ya Simu:  
Simu: 2203156/2203158  
Unapojibu Tafadhali taja:  
Kumb.Na: FA.282/293/01Q/327

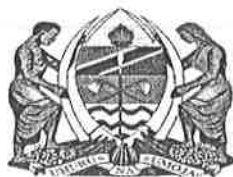

Ofisi ya Mkuu wa Mkoa,  
3 Barabara ya Rashidi Kawawa,  
S.L.P. 5429,  
12880, DAR ES SALAAM  
25 Aprili, 2016

Wakurugenzi,  
Halmashauri ya Manispaa,  
Ilala, Temeke na Kinondoni,  
**DAR ES SALAAM.**

**YAH: KIBALI CHA KUFANYA UTAFITI WA MAKUNDI MAALUM YALIYO KATIKA  
HATARI KUBWA YA MAAMBUKIZI YA VIRUSI VYA UKIMWI TANZANIA**

Tafadhali rejeeni kichwa cha habari hapo juu.

Taasisi ya utafiti wa madawa ya binadamu (NIMR), kituo cha Mwanza wakishirikiana na Kitengo cha kudhibiti maambukizi ya virusi vya **UKIMWI** (NACP), mradi wa SAUTI na Chuo Kikuu cha Sayansi za Tiba Muhimbili (MUHAS) wameomba kufanya utafiti katika Manispaa ya Temeke, Ilala na Kinondoni.

Madhumuni ya utafiti huu ni kupata taarifa ya kuishauri Kitengo cha kudhibiti maambukizi ya virusi vya **UKIMWI** kuhusu ukubwa wa tatizo na mahali ambapo makundi maalumu yanapatikana ili kuweza kutekeleza miradi ya kuzuia virusi vya **UKIMWI** kwa jamii.

Nawaleta kwenu ili muweze kuwapa ushirikiano waweze kufanikisha utafiti huu.

Nashukuru.

  
Dkt. Grace Elias Magembe  
k.n.y: **KATIBU TAWALA MKOA**  
**DAR ES SALAAM**

Nakala: Waganga Wakuu,  
Halmashauri ya Manispaa,  
Ilala, Temeke na Kinondoni,  
**DAR ES SALAAM.**

JAMHURI YA MUUNGANO WA TANZANIA  
OFISI YA RAIS  
TAWALA ZA MIKOA NA SERIKALI ZA MITAA

**MKOA WA NJOMBE**

Simu Na: (026) 2782912  
2782913  
Nukushi: (026) 2782914  
Barua pepe: [rc@njombe.go.tz](mailto:rc@njombe.go.tz)  
[ras@njombe.go.tz](mailto:ras@njombe.go.tz)  
[nfo@njombe.go.tz](mailto:nfo@njombe.go.tz)  
Unapojibu tafadhali  
Kumb. taja: AB.24/257/07/34

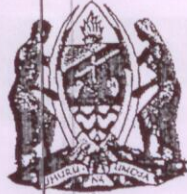

Ofisi ya Mkuu wa Mkoa  
S.L.P. 668  
**NJOMBE.**  
26/8/2016

**Mkurugenzi Mtendaji,**  
Halmashauri ya Wilaya Ludewa na Wanging'ombe, Njombe (w)

**Mkurugenzi,**  
Halmashauri ya Mji Njombe

**YAH: KUTAMBULISHA KWAKO WATAFITI TOKA NIMR  
WAKISHIRIKIANA NA SHIRIKA LA JHPIEGO SAUTI**

Rejea somo hapo juu,

Ofisi ya Mkuu wa Mkoa wa Njombe imepokea barua yenye Kumb.Na.189/Jhp-Sauti/FY16 ya tarehe 15/8/2016 kutoka shirika la Jhpiego SAUTI inayohusu utafiti uwepo wa makundi maalumu yaliyo katika hatari zaidi ya kupata maambukizi ya VVU (Key population) na maeneo wanakopatikana ndani ya Mkoa wa Njombe (mapping). Utafiti huu utafanyika kwa kushirikiana na NIMR kuanzia tarehe 29/8/2016 hadi tarehe 30/11/2016 katika Halmashauri za Wanging'ombe, Ludewa na Njombe Mji.

Kwa barua hii ninaomba uwaruhusu watafiti hawa kufanya kazi hii katika maeneo tajwa hapo juu. Ninaambatanisha nakala ya ruhusa ya kufanya utafiti huu (certificate of clearance) toka NIMR na ratiba ya utafiti huu.

Nawatakia kazi njema,

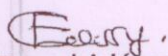  
Dkt. Eusebi Kessy  
KNY: KATIBU TAWALA (M)  
**NJOMBE**

**Nakala:** Katibu Tawala (M)-aione katika jalada

*Bu: SAUTI PHASE*

**THE UNITED REPUBLIC OF TANZANIA**  
**PRESIDENT'S OFFICE**  
**REGIONAL ADMINISTRATION AND LOCAL GOVERNMENT**

**MBEYA REGION**  
TELEGRAM: "REGCOM"  
Telephone No: 025-2504045  
Fax No.025-2504243  
Email: [rasmbeya@pmoralg.go.tz](mailto:rasmbeya@pmoralg.go.tz)

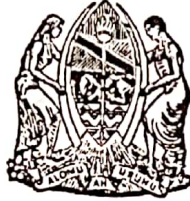

REGIONAL COMMISSIONER'S OFFICE  
P.O. Box 754,  
MBEYA.

In reply please quote:

Ref. No. DC.10/109/01/44

25<sup>th</sup> April, 2016

District Administrative Secretary,  
Mbeya, Rungwe, Mbarali, Kyela nad Chunya,  
**MBEYA REGION.**

National Institute for Medical  
Research - Mwanza  
Received *[Signature]*  
Date 25/5/16

Ref: **PERMISSION TO GIVE PERMITS**

The heading captioned above refers.

The National Institute for Medical research (NIMR) Mwanza Centre in collaboration with the National AIDS Control Program (NACP) SAUTI Program and Muhimbili University of Health and Allied Science (NUHAS) are conducting a study, titled "Mapping and Enumeration of Key Population in Tanzania. The study being carried in Mbeya Region, the Regional Administrative Secretary have authorized you to avail the aforementioned Institute permits to conduct their study in your District on behalf of Regional Administrative Secretary.

Do please accord them.

*[Signature]*  
I. E. Nganya

For: **REGIONAL ADMINISTRATIVE SECRETARY,**  
**MBEYA.**

**CC.** National Institute for Medical Research, - (Please be Informed)  
Mwanza Reseach Centre,  
P.O. Box 1462,  
**MWANZA.**

**THE UNITED REPUBLIC OF TANZANIA  
PRESIDENT'S OFFICE  
REGIONAL ADMINISTRATION AND LOCAL GOVERNMENT**

Telegrams "REGCOM" Shinyanga  
Tel. No. 028 -2762222  
Fax No: 028 - 2762310  
E-Mail: [ras.shinyanga@pmoralg.go.tz](mailto:ras.shinyanga@pmoralg.go.tz)

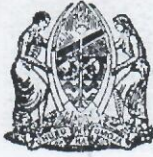

Regional Commissioner's Office,  
P O. Box 320,  
**Shinyanga:**

Ref. No. EC.81/271/01/32

10<sup>th</sup> May, 2016

District Executive Director  
**Kishapu, Msalala, Ushetu and Shinyanga**

Municipal Director  
**Shinyanga**

Town Director  
**Kahama**

**Re: MAPPING AND ENUMERATION OF KEY POPULATION IN TANZANIA**

Reference is made for the subject captioned above.

The National Institute for Medical Research (NIMR), Mwanza Centre in collaboration with the National AIDS Control Program (NACP) SAUTI program and Muhimbili University of Health and Allied Sciences (MUHAS) are conducting a study titled "Mapping and Enumeration of Key Population in Tanzania" in a number of selected regions in Tanzania including Shinyanga region. The aim of the study is to inform the National AIDS Control program on the size of key populations in the country, their HIV risk profiles and locations where they can be found so as to effectively implement HIV/AIDS interventions in this population. The study has been granted an approval by NIMR ethical review board. A copy of the ethics approval is herewith attached for your attention.

With this letter I am introducing to you a group of scientist for the said undertaking.

It is my hope that you will offer your maximum support for this activity.

Yours sincerely,

A handwritten signature in cursive script, appearing to read "Ntuli".

Dr. Ntuli A. Kapologwe  
**For: REGIONAL ADMINISTRATIVE SECRETARY  
SHINYANGA**

## OFISI YA RAIS

### TAWALA ZA MIKOA NA SERIKALI ZA MITAA HALMASHAURI YA WILAYA YA IRINGA

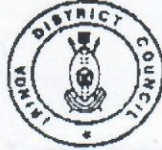

Barua zote ziandikwe kwa:  
Mkurugenzi Mtendaji wa Wilaya  
Simu nambari :2702828/2702585  
Fax Na. 2701776/2700580/2701755  
e-mail: [drignas.mlowe@iringadc.go.tz](mailto:drignas.mlowe@iringadc.go.tz)

IDARA YA AFYA NA USTAWI WA JAMII (W),  
S.L.P. 108,  
IRINGA.  
Tanzania

Kumb.Na. DMO/IR/T.40/2/115

22 SEPTEMBER, 2016

Afisa Mtendaji wa Kata,  
Kata ya Maboba, Wasa na Ilolompya  
H/Wilaya ya Iringa.

#### YAH: KIBALI CHA UTAFITI WA MAKUNDI MAALUM

Husika na somo hilo hapo juu.

Halmashauri imepokea barua kutoka kwa Katibu Tawala (M) yenye somo hilo hapo juu; kibali hicho kinaanza kuanzia tarehe 16/12/2015 mpaka tarehe 15/12/2016.

Kwa barua hii naomba uwapokee watatifi kutoka NIMR kwa ajili ya utafiti wa makundi ya watu maalum.

Naomba wapewe ushirikiano,



Samwel O. Nkya

**KAIMU MGANGA MKUU (W),  
HALMASHAURI YA WILAYA YA IRINGA.**

Nakala kwa: Wah. Madiwani,  
Kata za Maboba, Wasa na Ilolompya,  
H/Wilaya ya Iringa. – kwa taarifa.

DISTRICT MEDICAL OFFICE  
IRINGA DISTRICT COUNCIL  
P. O. BOX 108 - IRINGA



THE UNITED REPUBLIC OF TANZANIA  
PRESIDENT'S OFFICE  
REGIONAL ADMINISTRATION AND LOCAL GOVERNMENT

MBEYA REGION  
TELEGRAM: "ADMIN".  
Telephone No: 2502002  
In reply please quote:

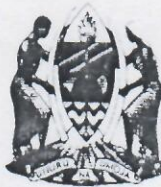

DISTRICT COMMISSIONER'S OFFICE,  
P.O. Box. 255,  
MBEYA.

Ref. No. AB.120/369/01/D/354

28<sup>th</sup> April, 2016

District Executive Director,  
Mbeya District Council,  
P.O. Box 599,  
**MBEYA.**

**REF: RESEARCH PERMIT**

Please refer to the above captioned subject.

The National Institute for Medical research (NIMR) Mwanza Centre in collaboration with the National AIDS Control Program (NACP) SAUTI Program and Muhimbili University of Health and allied Science (MUHAS) are conducting a study.

At the moment they conducting research on "Mapping and Enumeration of Key Population in Tanzania". A case study of Mbeya Rural.

Please assist them accordingly.

A handwritten signature in blue ink, appearing to read 'Tumsifu Ilomo'.

Tumsifu Ilomo  
For: **DISTRICT ADMINISTRATIVE SECRETARY**  
**MBEYA**

c.c. National Institute for Medical Research,  
Mwanza Research Centre,  
P.O. Box 1462,  
**MWANZA.** – Please be informed.

**JAMUHURI YA MUUNGANO WA TANZANIA  
OFISI YA RAIS  
TAWALA ZA MIKOA NA SERIKALI ZA MITAA**

Anuani ya simu "ADMIN"  
Simu ya mdomo 025 2552036  
FAX NO 0252552421 .

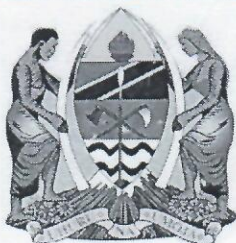

Ofisi ya Mkuu wa Wilaya Rungwe,  
S.L.P 34,  
**TUKUYU.**

12/05/2016

Unapojibu taja:-  
Kumb.AB.353/574/01/146

Afisa Mtendaji Kata ya

.....  
**WILAYA YA RUNGWE.**

**Yah: IDADI NA MAHALI YAPATIKANAPO MAKUNDI MAALUM NCHINI TANZANIA**

Tafadhali rejea mada tajwa hapo juu.

Nakitambulisha kwako kituo cha Utafiti (NIMR) Tawi la Mwanza kwa kushirikiana na Taasisi ya Taifa ya Kuzuia UKIMWI (AIDS) Progm ya SAUTI na Chuo cha Muhimbili (NUHAS) Inafanya utafiti unaohusu **IDADI NA MAHALI YAPATIKANAPO MAKUNDI MAALUM NCHINI TANZANIA**

Kibali kitatumika kuanzia tarehe 15/5/201 mpaka tarehe 15/6/2016.

Tafadhali mpeni ushirikiano.

*S. Mawila.*  
Susan E. Mawila

**Kny: KATIBU TAWALA WILAYA  
RUNGWE.**

**Kny KATIBU TAWALA WILAYA  
RUNGWE**

**Nakala:** Mkuu wa Wilaya  
**RUNGWE**- Aione ndani ya jalada.

“ Katibu Tawala Wilaya  
**WILAYA YA RUNGWE.** – Aione ndani ya jalada

“ Mkurugenzi Mtendaji,  
Halmashauri ya Wilaya  
**RUNGWE.** - Kwa taarifa.

**HALMASHAURI YA WILAYA YA USHETU**  
**Barua zote zipelekwe kwa Mkurugenzi Mtendaji (W)**

Mkoa wa Shinyanga.  
Simu : 028-2710110  
Fax 028-2710100  
[mkurugenzi@ushetucoucil.go.tz](mailto:mkurugenzi@ushetucoucil.go.tz)  
Unapojibu Tafadhali taja:  
Kumb. M.10/15/182  
Afisa Mtendaji wa Kata,  
Kata ya Igwamanoni  
Ushetu.

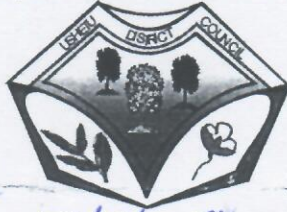

Ofisi ya Mkurugenzi Mtendaji (W),  
S. L. P. 50,  
USHETU.

Tarehe 31/05/2016

*Inepitishwa*  
*[Signature]*  
*18/06/2016*

**AFISA MTENDAJI WA KATA,  
KATA YA IGWAMANONI  
USHETU**

**YAH: KUTAMBULISHA WATAMBUZI WA MAENEO MUHIMU YANAYOPATIKANA  
MAKUNDI MAALUMU KWA AJILI YA KUPAMBANA NA VVU/UKIMWI**

Husikeni na mada tajwa hapo juu.

Taasisi ya utafiti wa magonjwa ya binadamu (NIMR) kanda ya Mwanza kwa kushirikiana na Mpango wa Taifa wa Kudhibiti UKIMWI (NACP) kupitia mradi wa SAUTI litaendesha zoezi la utambuzi wa maeneo muhimu yanayopatikana makundi maalumu (Key Population). Lengo la utambuzi huu ni kupata taarifa muhimu zitakazosaidia katika kupambana na VVU/UKIMWI kwa maeneo yaliyo katika hatari zaidi.

Kwa barua hii, mnaombwa kutoa ushirikiano mkubwa kwa watambuzi watakaotumwa na taasisi ya NIMR- Mwanza ili malengo ya zoezi hili yafikiwe kwa maendeleo ya Halmashauri yetu, Wilaya, Mkoa na Taifa kwa ujumla.

Tarehe rasmi ya zoezi mtajulishwa na mdau wetu.

Nawatakia utekelezaji mwema.

*[Signature]*

Isabela O. Chilumba  
Mkurugenzi Mtendaji  
Halmashauri ya Wilaya  
Ushetu

Nakala  
Mheshimiwa diwani,  
Kata ya Igwamanoni,  
Ushetu.

**MKURUGENZI MTENDAJI (W)  
USHETU**

# TEMEKE MUNICIPAL COUNCIL

[All letters should be addressed to the Municipal Director]

Tell: +255 22-2851054  
Fax: +255 22-2850640  
E-mail: temekemanispaa@tmc.go.tz  
website: www.tmc.go.tz

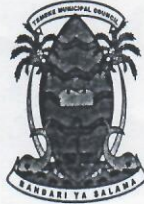

P.O.Box: 46343,  
Mandela Road  
DAR ES SALAAM,  
TANZANIA.

Ref. No. TMC/MD/ U.21/30

Date: 27/04/2016

WEOs  
TEMEKE MUNICIPALITY

RE: RESEARCH PERMIT DR. AMANI SHAO & OTHERS

Please refer to the heading above

This is to inform you that, permission is granted to the above mentioned student/Researcher from NIMR to conduct research on Makundi Haduni ya Kikuu Kikuu Maambukizi wa T.me case study of T.me.

This permit will effect from the date of this letter.

Please give with necessary assistance.

  
For: MUNICIPAL DIRECTOR  
TEMEKE  
For: MUNICIPAL DIRECTOR  
TEMEKE

Tafadhali wapokee  
na wape  
uchirikiano  
18/5/2016

AFISA MTENDAJI WA KATA  
TANDIKA

Copy to: - Student/Researcher DR AMANI SHAO & OTHERS  
From NIMR

# HALMASHAURI YA MANISPAA YA SHINYANGA

Simu. 028-2763213  
028-2762534  
Fax: 028-2763750  
E-mail: [municipalshy@yahoo.com](mailto:municipalshy@yahoo.com)

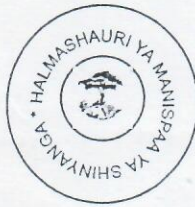

Ofisi ya Mkurugenzi wa Manispaa,  
S.L.P. 28,  
SHINYANGA

Tarehe: 18.07.2016

Unapojibu Tafadhali Taja

Kumb. Na. SHY/MC/M.10/20/04

Afisa Mtendaji  
Kata ya .....  
S.L.P 28  
SHINYANGA.

*Inemtihiwa  
Husemi  
18/7/2016  
Ushirikiano wakuwepo*

**MTENDAJI WA KATA  
KATA YA NGOKOLO  
MANISPAA - SHINYANGA**

## YAH: KUTAMBULISHA WATAMBUZI WA MAENEO MUHIMU YANAYOPATIKANA MAKUNDI MAALUM KWA AJILI YA KUPAMBANA NA VVU/UKIMWI

Husika na somo tajwa hapo juu.

Taasisi ya utafiti wa magonjwa ya binadamu (NIMR) kanda ya Mwanza kwa kushirikiana na Mpango wa Taifa wa kudhibiti UKIMWI (NACP) kupitia mradi wa SAUTI litaendesha zoezi la utambuzi wa maeneo muhimu yanayopatikana makundi maalum (Key Population). Lengo la utambuzi huu ni kupata taarifa muhimu zitakazosaidia katika kupambana na VVU/UKIMWI kwa maeneo yaliyo katika hatari zaidi.

Kwa barua hii, mnaombwa kutoa ushirikiano mkubwa kwa watambuzi watakaotumwa na taasisi ya NIMR- Mwanza ili malengo ya zoezi hili yafikiwe kwa maendeleo ya Halmashauri yetu, Wilaya, Mkoa na Taifa kwa ujumla.

Nawatakia utekelezaji mwema.

A handwritten signature in black ink, appearing to read 'Lewis Kalinjuna'.

Lewis Kalinjuna  
Mkurugenzi wa Manispaa  
Manispaa ya Shinyanga

MKURUGENZI WA MANISPAA  
HALMASHAURI YA MANISPAA  
SHINYANGA

# HALMASHAURI YA WILAYA YA MUFINDI

(Barua zote zitumwe kwa Mkurugenzi Mtendaji Wilaya)

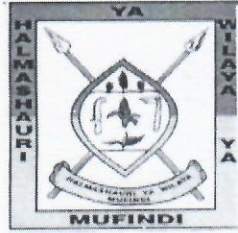

S.L.P 223,  
SIMU: 026-2772614  
FAX: 026-2772070  
Email:  
dedmufindi@gmail.com

**Kumb.Na. HW/MUF/ S.50/17/25**

**14 Septemba, 2016**

Watendaji wa Kata za,  
Nyololo, Luhunga, Igombavanu, Kasanga,  
Ifwagi na Makungu

**Halmashauri ya Wilaya ya Mufindi**

**YAH: KUITAMBULISHA TIMU YA WAFANYA UTAFITI NA TATHMINI KUHUSU  
MAKUNDI MAALUM KATIKA KATA YAKO**

Kichwa cha Habari hapo juu chahusika.

Timu ya wafanyakazi kutoka NIMR wakishirikiana na Sauti Project, Chuo Kikuu Mannitoba na MUHAS wanafanya utafiti na tathmini ya mambo mbalimbali yanayohusu Makundi Maalumu katika Mkoa 12 ya Tanzania Bara ikiwemo Mkoa wa Iringa.

Katika Mkoa wa Iringa, Tafiti hii pia itafanyika katika Halmashauri ya Wilaya ya Mufindi na katika Kata yako. Hivyo basi kwa barua hii unatakiwa uwapokee watafiti hawa na kuwapatia ushirikiano katika kata yako.

**Dr.Fredrick Mugarula**  
Kny Mkurugenzi Mtendaji Wilaya  
**MUFINDI**

MGANGA MKUU WA WILAYA YA  
MUFINDI

OFISI YA KATA  
SLP 129  
MAFINGA  
26-09-2016

MWEMBEZI WA KUTU  
AFISA MENDAJI

YAH: KUWATAMBULISHA WATU WA UTAFITI  
WA MMR

Hesika na Somo hilo. Watajua kupo juu wape  
Ushirikiano wa kina zilo kufanikisha lengo la utafiti.

Natambuliza Shukrani

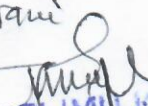  
AFISA ELIMU KATA  
KATA YA IGOMBAVANU

for WEO  
IGOMBAVANU

0754557567  
EB. SAMBA YEMA

AFISA MTENDAJI WA KATA,  
KATA YA KALOBÉ,  
S.L.P 149,  
MBEYA.

MAAFSA WATENDAJI WA MITAA,  
KATA YA KALOBÉ;  
P.O BOX 149,  
MBEYA.

YAH: BARUA YA UTAMIBULISHO.

Husika na kichwa cha barua hayo juu.  
Napenda kuwatambulisha wanafunzi kutoka  
shirika la utafiti (MIMR) kituo cha Mwanza.  
Pamoja na utambulisho huo watafanya utafiti  
kuhusu makundi maalum yaliyopo kwenye  
athari ya maambukizi ya virusi vya ukinwi  
Maomba muwape ushirikiano.

/ Afisa mtendaji wa kata ya kalobé

Mwanza.

AFISA MTENDAJI  
KATA YA KALOBÉ  
HALMASHAURI YA JIJI  
S.L.P. 149 MBEYA
